# Supplementary material for: Three-dimensional In2O3–CuO inverse opals: synthesis and improved gas sensing properties towards acetone
Source: Royal Society of Chemistry journal article supplement (doi:10.1039/c6ra07483a), 2016-01-01
Supplement: c6ra07483a1.pdf [file c6ra07483a1.pdf]

## **Three dimensional In<sub>2</sub>O<sub>3</sub>–CuO inverse opals: synthesis and improved gas sensing properties towards acetone**

Ruiqing Xing, Kuang Sheng, Lin Xu\*, Wei Liu, Jian Song and Hongwei Song\*

*State Key Laboratory on Integrated Optoelectronics, College of Electronic Science and Engineering, Jilin University, Changchun, 130012, People's Republic of China*

Corresponding to:

Dr. Lin Xu E-Mail: [linxu@jlu.edu.cn](mailto:linxu@jlu.edu.cn) Tel: 86-431-81736604

Prof. Hongwei Song E-Mail: [songhw@jlu.edu.cn](mailto:songhw@jlu.edu.cn) Tel: 86-431-81736614

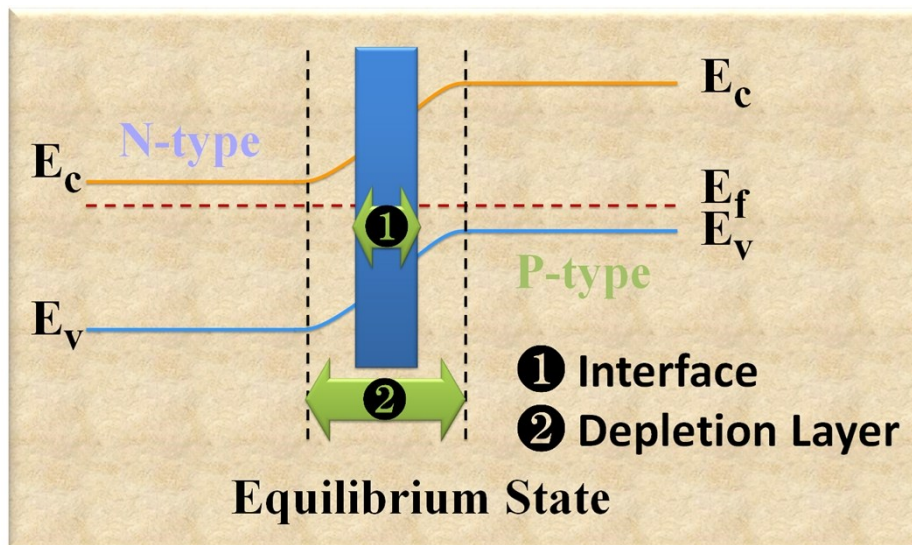

**Figure S1.** Energy band diagrams of the  $\text{In}_2\text{O}_3$ - $\text{CuO}$  heterojunction.  $E_c$ , lower level of conduction band;  $E_f$ , Fermi level;  $E_v$ , upper level of valence band.
